# Supplementary material for: Comparison of genomes and proteomes of four whole genome-sequenced Campylobacter jejuni from different phylogenetic backgrounds
Source: PubMed Central journal article supplement (PMC5749857; doi:10.1371/journal.pone.0190836), 2018-01-02

# Figure S1

## 00-0949 Core genome

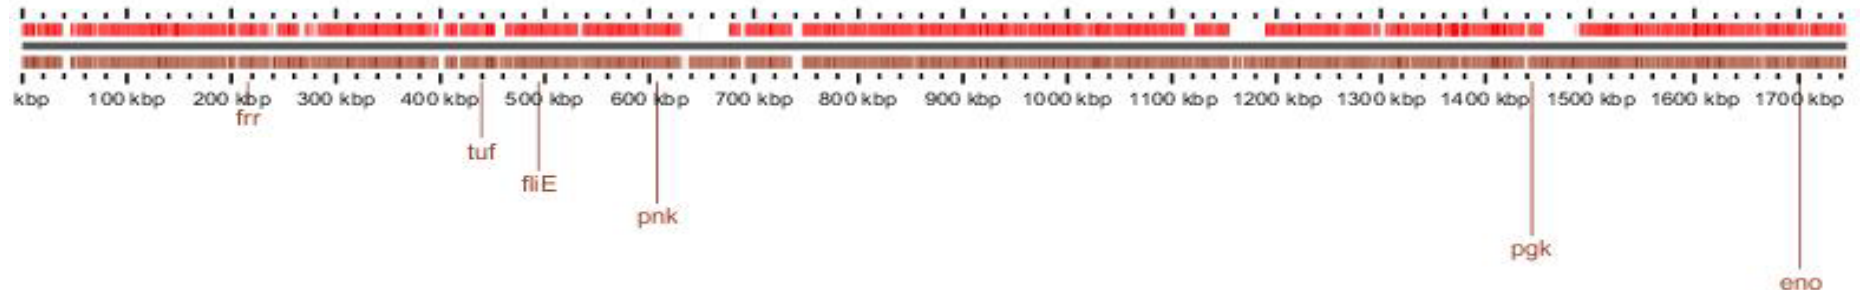

## 01-1512 Core genome

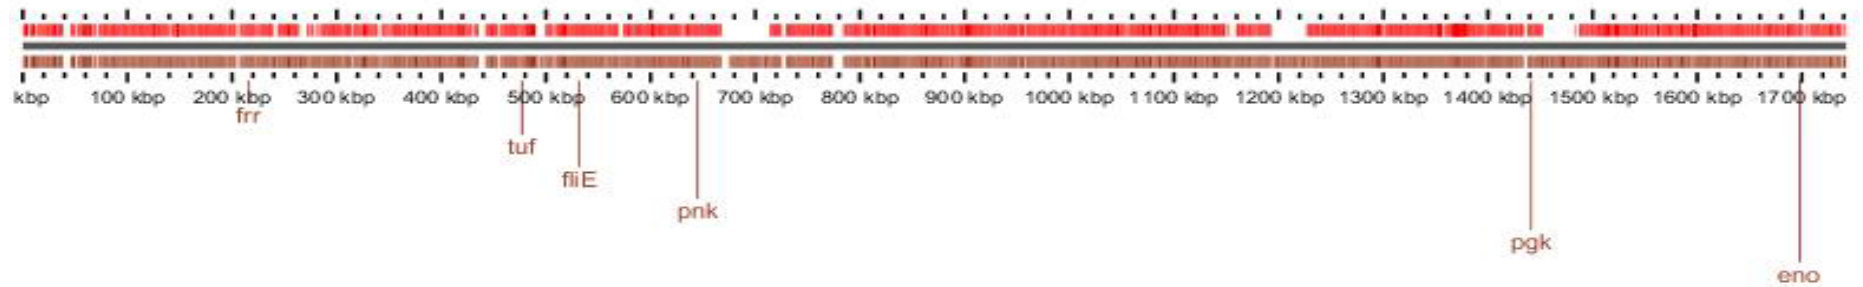

## 00-6200 Core genome

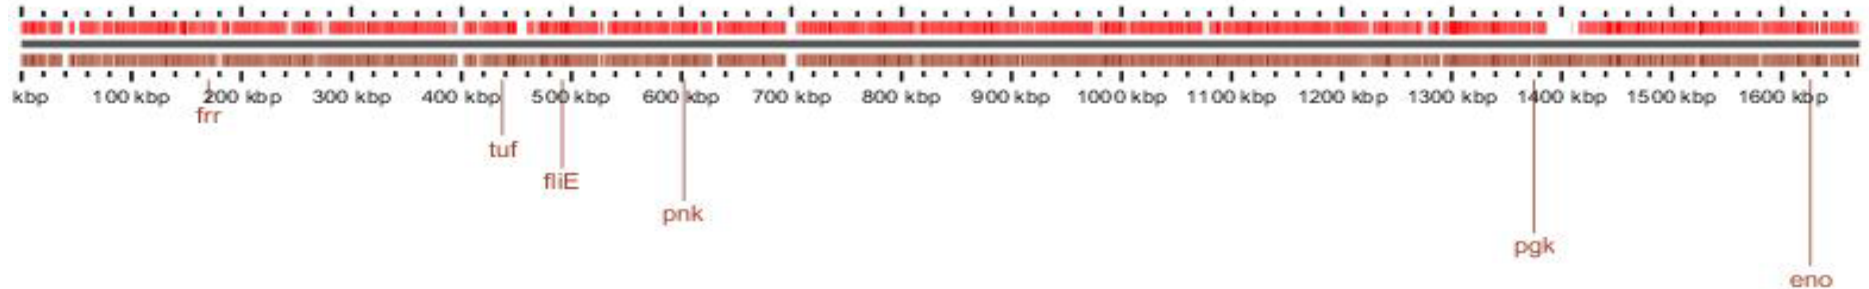

## 00-1597 Core genome

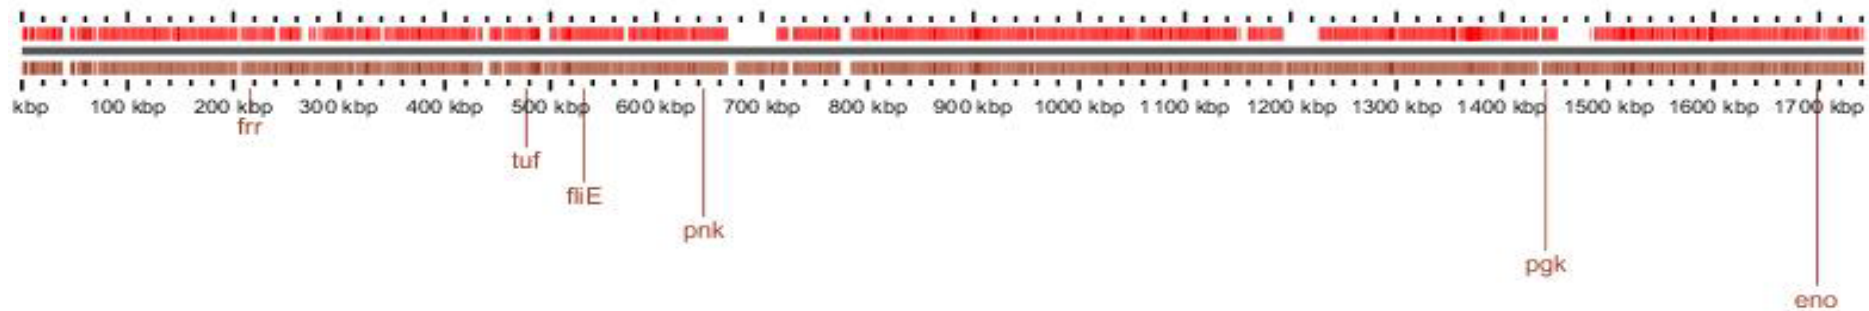

Supplement: pone.0190836.s006.pdf [file pone.0190836.s006.pdf]
