# Supplementary material for: Comparison of genomes and proteomes of four whole genome-sequenced Campylobacter jejuni from different phylogenetic backgrounds
Source: PubMed Central journal article supplement (PMC5749857; doi:10.1371/journal.pone.0190836), 2018-01-02

Figure S3

00-0949 Unique genome

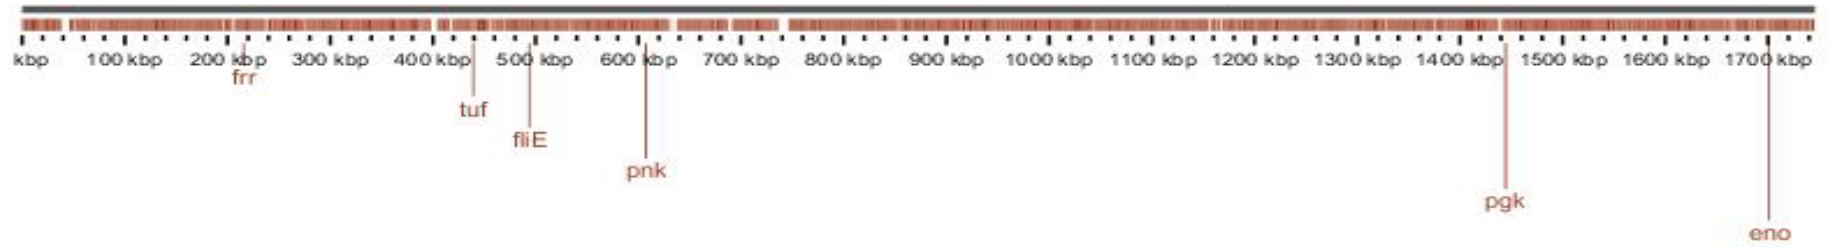

01-1512 Unique genome

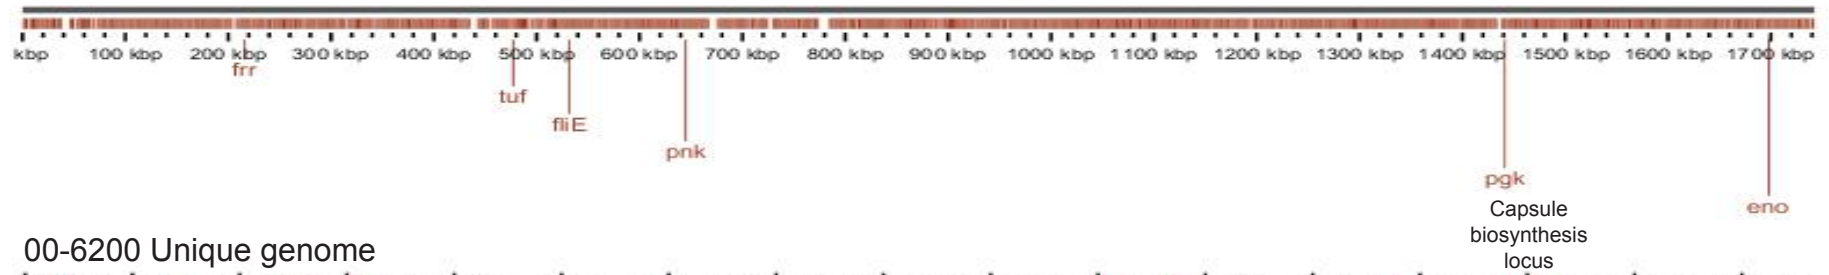

00-6200 Unique genome

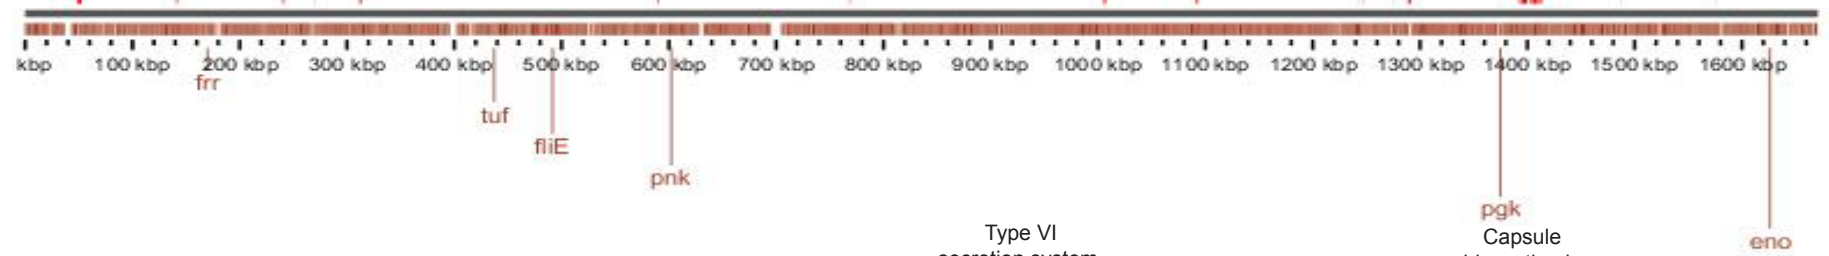

00-01597 Unique genome

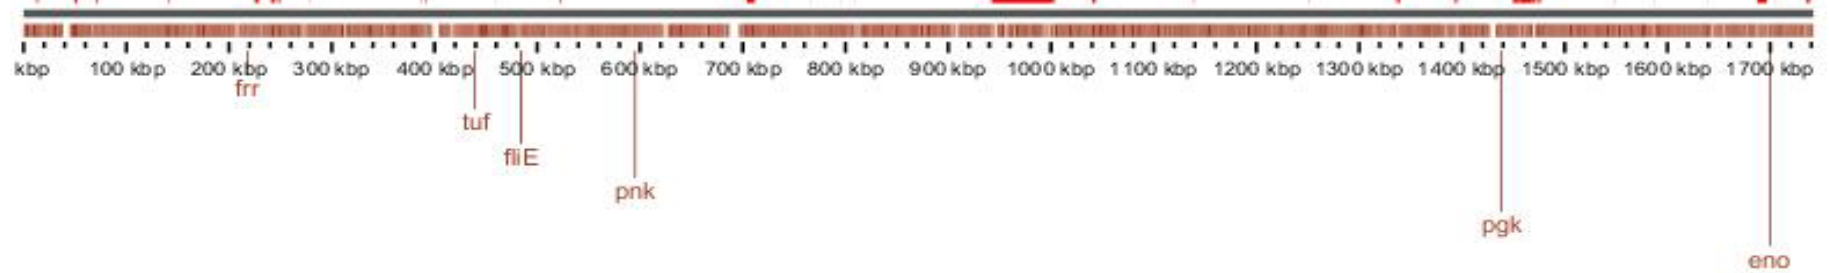

Supplement: pone.0190836.s008.pdf [file pone.0190836.s008.pdf]
