# Supplementary material for: Comparison of genomes and proteomes of four whole genome-sequenced Campylobacter jejuni from different phylogenetic backgrounds
Source: PubMed Central journal article supplement (PMC5749857; doi:10.1371/journal.pone.0190836), 2018-01-02
Supplement: pone.0190836.s010.pdf [file pone.0190836.s010.pdf]

Figure S5

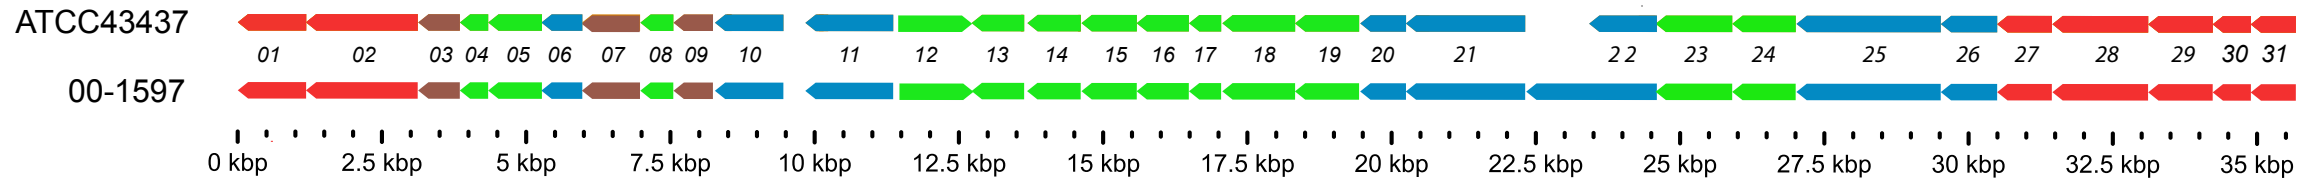

- |                                                                                                                                                                                                                                                                                                                                                                                                                                                                                                                                                                                                                                                                                                                                                                                                                                                                                      |                                                                                                                                                                                                                                                                                                                                                                                                                                                                                                                                                                                                                                                                                                                                                                                                                                                                                                                                                                                                                                                                                                                                                                                                |
|--------------------------------------------------------------------------------------------------------------------------------------------------------------------------------------------------------------------------------------------------------------------------------------------------------------------------------------------------------------------------------------------------------------------------------------------------------------------------------------------------------------------------------------------------------------------------------------------------------------------------------------------------------------------------------------------------------------------------------------------------------------------------------------------------------------------------------------------------------------------------------------|------------------------------------------------------------------------------------------------------------------------------------------------------------------------------------------------------------------------------------------------------------------------------------------------------------------------------------------------------------------------------------------------------------------------------------------------------------------------------------------------------------------------------------------------------------------------------------------------------------------------------------------------------------------------------------------------------------------------------------------------------------------------------------------------------------------------------------------------------------------------------------------------------------------------------------------------------------------------------------------------------------------------------------------------------------------------------------------------------------------------------------------------------------------------------------------------|
| <p>01 <i>kpsS</i> capsular polysaccharide export protein<br/>         02 <i>kpsC</i> capsular polysaccharide export protein<br/>         03 inositol monophosphatase<br/>         04 hypothetical protein<br/>         05 D-3-phosphoglyceratedehydrogenase/2-hydroxyacid dehydrogenase<br/>         06 acetylneuraminate cytidyltransferase<br/>         07 oxidoreductase<br/>         08 sugar isomerase<br/>         09 metal-dependent hydrolase/cyclase<br/>         10 hypothetical protein<br/>         11 CMP-N acetylneuraminate-beta-galactosamide-alpha-2,3 sialyltransferase/hypothetical protein<br/>         12 O-antigen synthesis protein WbyH/hypothetical protein<br/>         13 WbcB/hypothetical protein<br/>         14 NAD-dependent epimerase/dehydratase<br/>         15 epimerase/hypothetical protein<br/>         16 epimerase/hypothetical protein</p> | <p>17 dTDP-4-deoxyrhamnose 3,5-epimerase<br/>         18 UDP-glucose dehydrogenase/UDP-glucose 6-dehydrogenase<br/>         19 dTDP-glucose 4,6-dehydratase/epimerase<br/>         20 glucose-1 phosphate cytidyltransferase<br/>         21 CMP-N acetylneuraminate-beta-galactosamide-alpha-2,3sialyltransferase/hypothetical protein<br/>         22 beta-1,3-galactosyltransferase/beta-1,4-galactosyltransferase/hypothetical protein<br/>         23 glycosyltransferase family 2<br/>         24 UDP-galactopyranose mutase<br/>         25 beta-1,3-glucosyltransferase<br/>         26 glycosyltransferase/capsular biosynthesis protein<br/>         27 <i>kpsF</i> arabinose-5-phosphate isomerase<br/>         28 <i>kpsD</i> capsular polysaccharide export system periplasmic protein/sugar ABCtransportersubstrate-binding protein<br/>         29 <i>kpsE</i> capsular polysaccharide export system inner membrane protein/capsule biosynthesis protein<br/>         30 <i>kpsT</i> capsule polysaccharide export ATP-binding protein/ATP transporter ATP-binding protein<br/>         31 <i>kpsM</i> capsular polysaccharide ABC transporter/capsule biosynthesis protein</p> |
|--------------------------------------------------------------------------------------------------------------------------------------------------------------------------------------------------------------------------------------------------------------------------------------------------------------------------------------------------------------------------------------------------------------------------------------------------------------------------------------------------------------------------------------------------------------------------------------------------------------------------------------------------------------------------------------------------------------------------------------------------------------------------------------------------------------------------------------------------------------------------------------|------------------------------------------------------------------------------------------------------------------------------------------------------------------------------------------------------------------------------------------------------------------------------------------------------------------------------------------------------------------------------------------------------------------------------------------------------------------------------------------------------------------------------------------------------------------------------------------------------------------------------------------------------------------------------------------------------------------------------------------------------------------------------------------------------------------------------------------------------------------------------------------------------------------------------------------------------------------------------------------------------------------------------------------------------------------------------------------------------------------------------------------------------------------------------------------------|

■ Capsular transport and assembly   
 ■ Hypothetical genes/unknown function   
 ■ Sugar biosynthesis   
 ■ Transferases
