# Supplementary material for: Comparison of genomes and proteomes of four whole genome-sequenced Campylobacter jejuni from different phylogenetic backgrounds
Source: PubMed Central journal article supplement (PMC5749857; doi:10.1371/journal.pone.0190836), 2018-01-02

Figure S6

ATCC 43432

YH001

00-6200

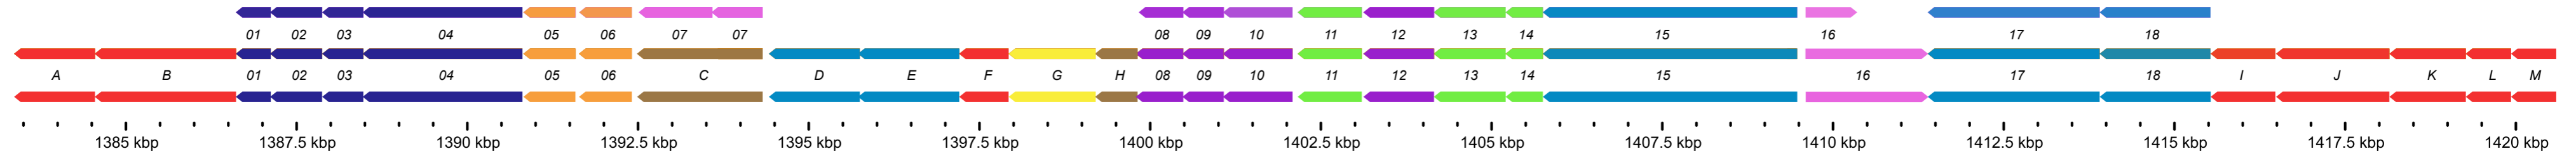

A *kpsS* capsule polysaccharide transporter  
 B *kpsC* capsule polysaccharide transporter  
 01 adenylylsulfate kinase  
 02 sugar nucleotidyltransferase  
 03 amidotransferase/gamma-glutamyl-gamma-aminobutyrate hydrolase  
 04 transferase/hypothetical protein  
 05 methyltransferase  
 06 methyltransferase  
 07 MeOPN transferase

C hypothetical protein  
 D alpha-2,3-sialyltransferase  
 E glycosyltransferase family 2  
 F capsular polysaccharide biosynthesis protein  
 G uridine kinase  
 H hypothetical protein  
 08 sugar phosphate nucleotidyltransferase/D-glycero-D-manno-heptose 1-phosphate guanosyltransferase  
 09 sedoheptulose 7-phosphate isomerase/phosphoheptose isomerase  
 10 D-glycero-D-manno-heptose 1-phosphate kinase/dehydrogenase

11 sugar-nucleotide epimerase/dehydratase/ membrane protein  
 12 GDP-mannose 4,6-dehydratase  
 13 GDP-fucose synthetase/GDP-4-keto-6-deoxy-D-mannose-3,5-epimerase-4-reductase  
 14 nucleotide sugar epimerase/dehydratase/ dTDP-4-dehydrorhamnose 3,5-epimerase  
 15 sugar transferase  
 16 MeOPN transferase/hypothetical protein  
 17 sugar transferase/capsular polysaccharide biosynthesis protein  
 18 glycosyltransferase/sugar transferase  
 I *kpsF* arabinose-5-phosphate isomerase  
 J *kpsD* sugar ABC transporter substrate-binding protein

K *kpsE*capsule polysaccharide transporter  
 L *kpsT* ATP transporter ATP-binding protein  
 M *kpsM* capsule polysaccharide transporter

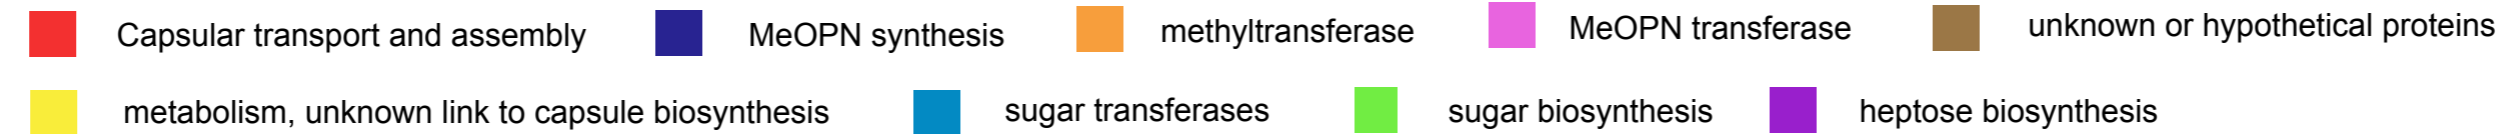

Supplement: pone.0190836.s011.pdf [file pone.0190836.s011.pdf]
